# Supplementary material for: CD169 Expressing Macrophage, a Key Subset in Mesenteric Lymph Nodes Promotes Mucosal Inflammation in Dextran Sulfate Sodium-Induced Colitis
Source: PubMed Central journal article supplement (PMC5483437; doi:10.3389/fimmu.2017.00669), 2017-06-26
Supplement: presentation_1.pdf [file presentation_1.pdf]

## Supplementary Material

# CD169 expressing macrophage, a key subset in mLNs promotes mucosal inflammation in DSS-induced colitis

Qiuting Li<sup>1</sup>, Dan Wang<sup>1</sup>, Shengyu Hao<sup>1</sup>, Xiaolei Han<sup>1</sup>, Yuan Xia<sup>1</sup>, Xiangzhi Li<sup>1</sup>,

Yaoping Chen<sup>2</sup>, Masato Tanaka<sup>3</sup>, Chun-Hong Qiu†

\* **Correspondence:** Chun-Hong Qiu, E-mail: [qiuchun@sdu.edu.cn](mailto:qiuchun@sdu.edu.cn);

### 1 Supplementary Figures

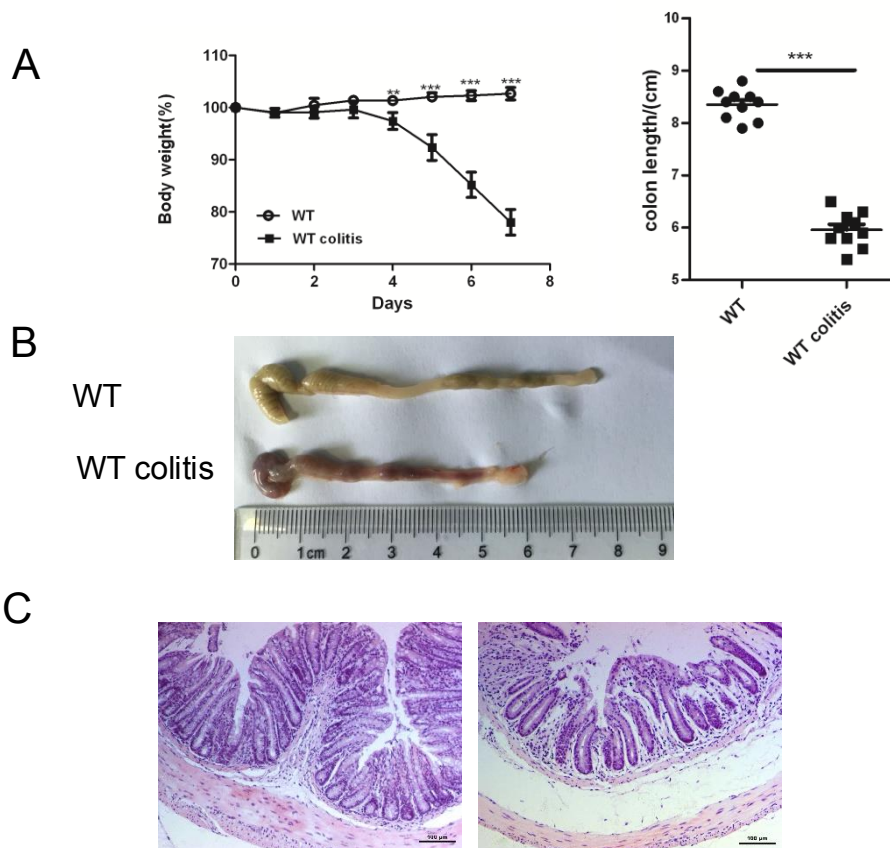

**Supplementary Figure 1.** WT mice were both orally treated with 3.5%DSS for 7 days. (A)Weight loss of WT mice (n = 5) and WT colitis mice (n=5), \*\*P<0.001.\*\*\*P<0.001, compared to control. (B) Macroscopic observation of WT control and WT colitis colons and the statistical analysis of the

length of WT control and WT colitis mice colons. (n=10).Statistical analysis was determined by Student's t test,\*\*\*P<0.001. (C)Immunohistochemistry analysis of colons sections obtained from WT control mice and WT colitis mice. Data are representative of two independent experiments.
